# Supplementary material
Source: PubMed Central journal article supplement (PMC4291620)
Supplement: pnas.201422656SI.pdf [file pnas.201422656SI.pdf]

# Supporting Information

Li et al. 10.1073/pnas.1422656112

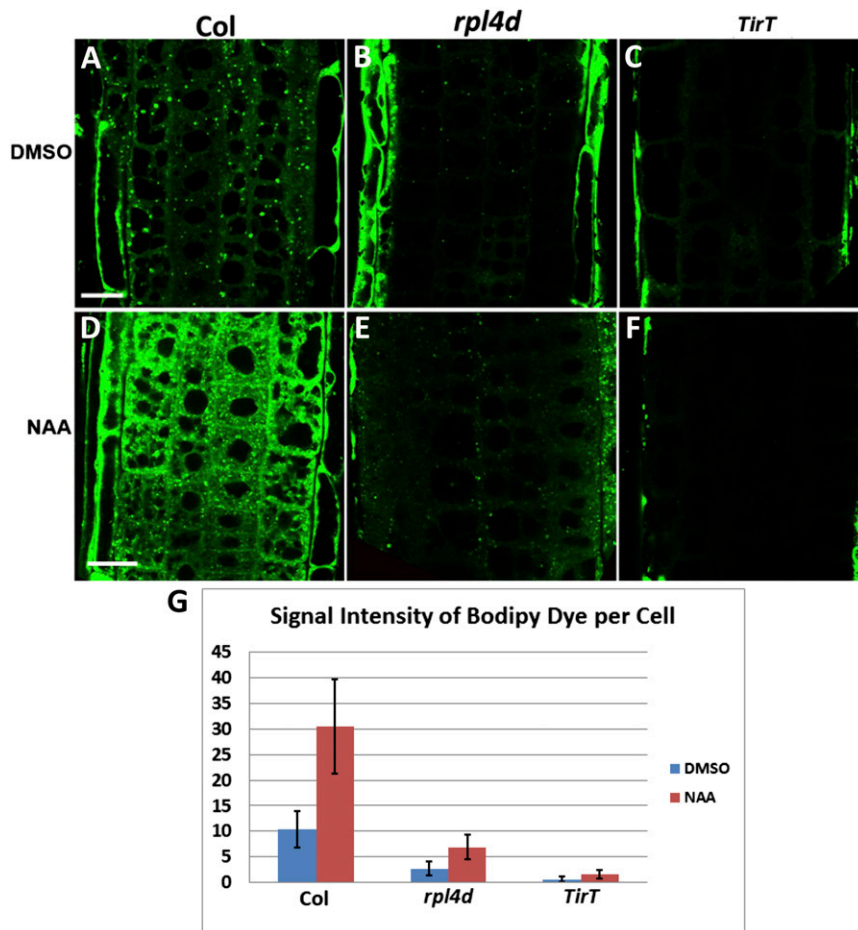

**Fig. S1.** *rpl4d* and *TirT* mutants reduced Bodipy dye signal with or without NAA treatment. (A–C) Bodipy dye staining pattern in root transition zone of 7-d-old seedlings from Col (A), *rpl4d* (B), or *TirT* (C) after treatment with DMSO (0.1%) for 6 h. (Scale bars, 10  $\mu\text{m}$ .) (D–F) Bodipy dye staining pattern in root transition zone of 7-d-old seedlings from Col (D), *rpl4d* (E), or *TirT* (F) after treatment with 100 nM NAA for 6 h. (Scale bars, 10  $\mu\text{m}$ .) (G) Quantification of signal intensity of Bodipy dye in Col, *rpl4d* or *TirT* mutants after DMSO or NAA treatment. Images from A–F were taken from a single scan in the middle section of the transition region in the root. For G, 300 cells from 20 seedlings were used for data quantification. Error bars represent SD.

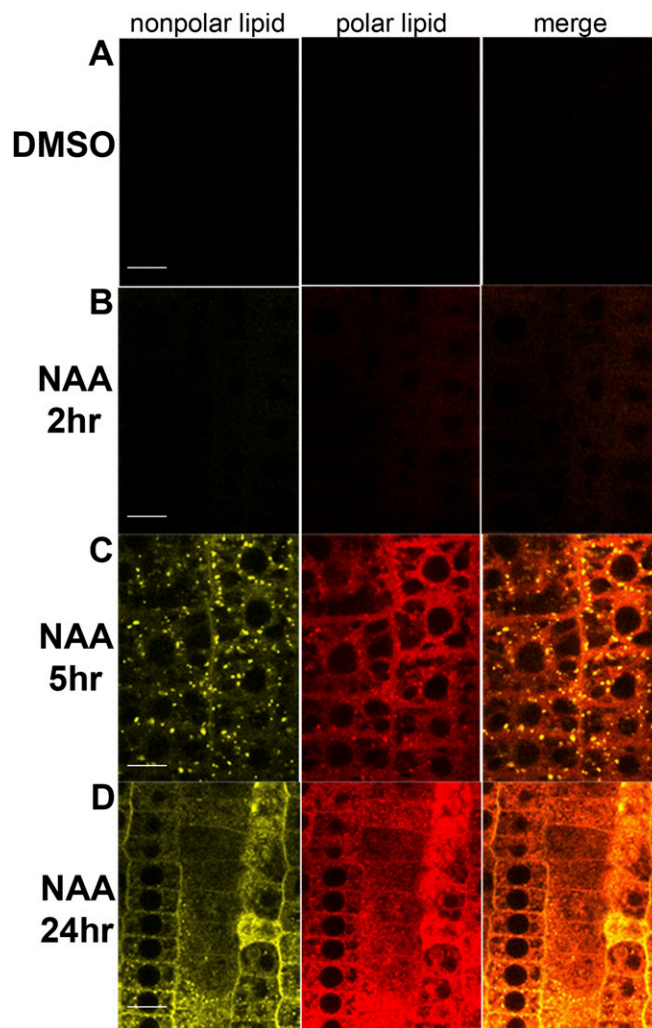

**Fig. S2.** Time-course of Nile red staining pattern after NAA induction. (A–D) Nile red staining pattern in root transition zone after treatment by DMSO or 100 nM NAA treatment for 2 h (B), 5 h (C), or 24 h (D), respectively. For all of the images, the *Left* is nonpolar lipid, *Center* is polar lipid, and *Right* is a merged image from the other two. Images represent data taken from at least three independent experiments. (Scale bars, 10  $\mu\text{m}$ .)

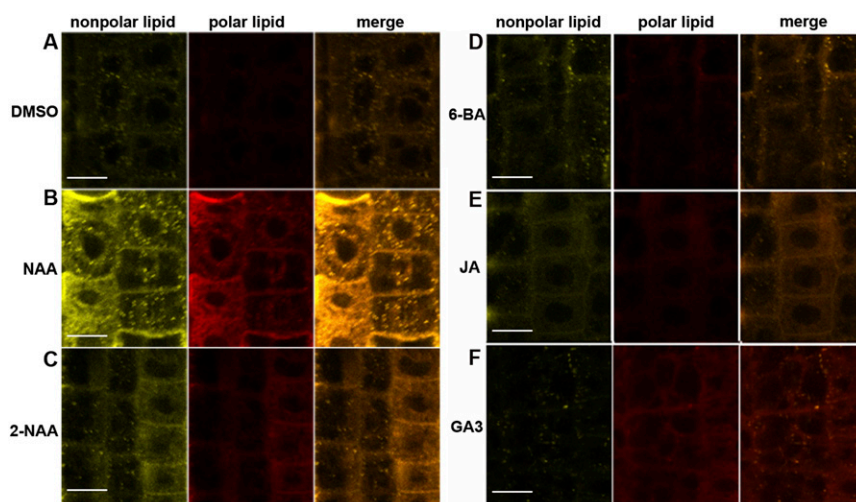

**Fig. S3.** Nile red staining pattern after treatment with different hormones. (A–F) Nile red staining pattern in root transition zone after treatment by DMSO, NAA (B), 2-NAA (C), 6-BA (D), JA (E), or ABA (F), respectively. For all of the images, the *Left* is nonpolar lipid, *Center* is polar lipid, and *Right* is merged image from the above two. Images represent data taken from at least three independent experiments. (Scale bars, 10  $\mu\text{m}$ .)

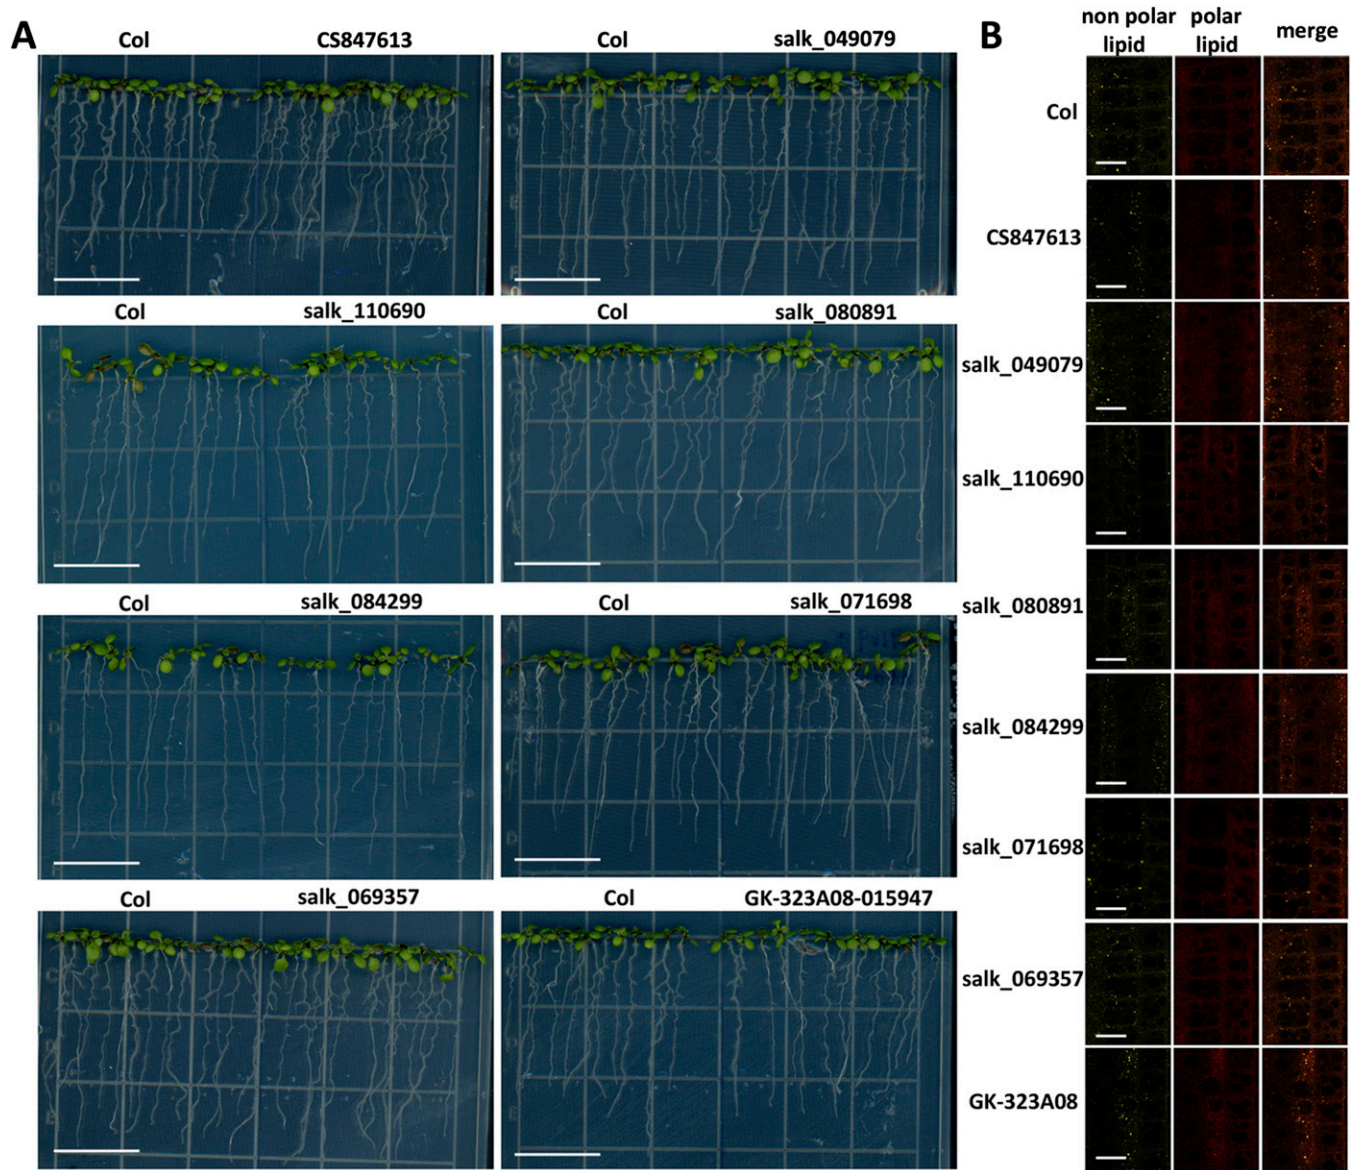

**Fig. 54.** Phenotype comparison between T-DNA insertion mutant and Col wild-type seedlings. (A) Phenotypes of 10-d-old seedlings of Col and T-DNA mutants. (Scale bars, 1 cm.) (B) Nile red staining of 7-d-old seedlings of Col and T-DNA mutants. (Scale bars, 10 μm.) Images represent data taken from three independent experiments.

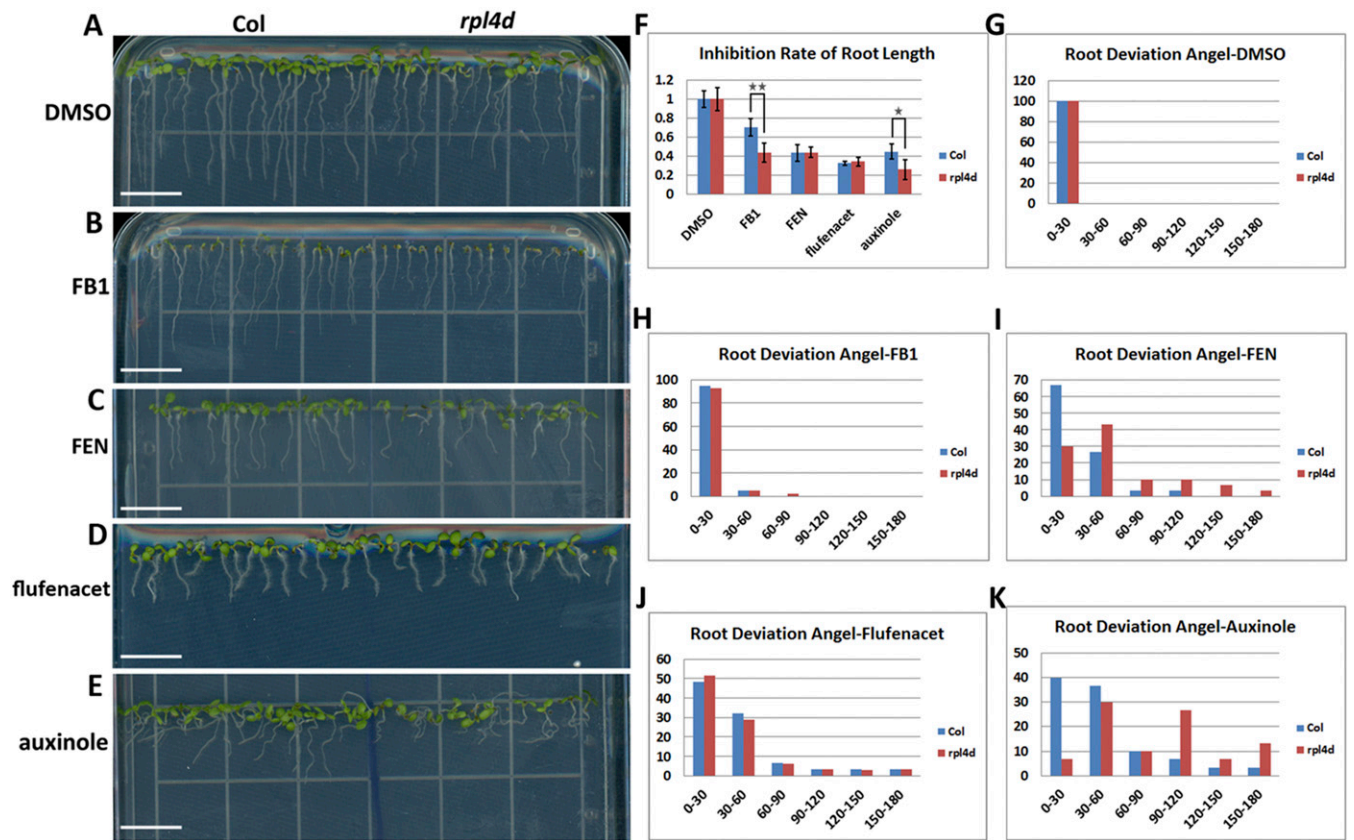

**Fig. S5.** *rpl4d* mutants displayed hypersensitivity to sphingolipid and sterol inhibitors but not fatty acid inhibitor. (A–E) Growth phenotypes of 7-d-old seedlings of Col and *rpl4d* mutants on medium with DMSO (0.1%) (A), 500 nM FB1 (B), 50 μM FEN (C), 200 nM flufenacet (D), or 5 μM auxinole (E). (Scale bars, 1 cm.) (F) Quantification of root inhibition rate of Col and *rpl4d* mutants grown on medium with different lipid inhibitors or auxinole compared with on medium with DMSO. \* $P < 0.05$ , \*\* $P < 0.001$ . One-hundred roots of each genotype were used for quantification. Error bars represent SD. (G–K) Quantification of root deviation angel from vertical position in Col and *rpl4d* mutants when grown on medium with DMSO (0.1%) (G), 500 nM FB1 (H), 50 μM FEN (I), 200 nM flufenacet (J), or 5 μM auxinole (K). The x axis represents the range of different deviation angels; the y axis represents the percentage of roots fall into different deviation angel ranges; 120 roots of each genotype were used for quantification.

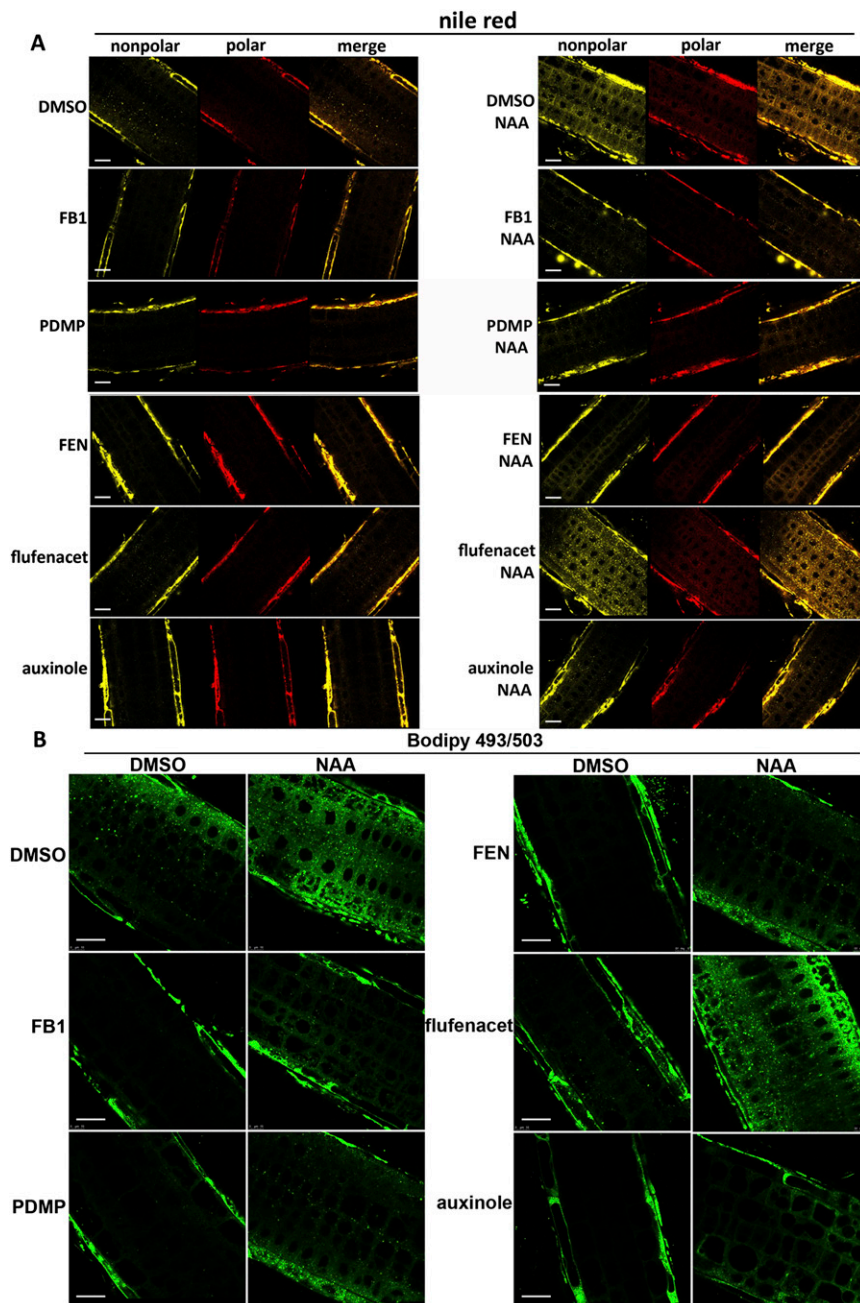

**Fig. S6.** Lipid inhibitors reduce NAA induced lipid accumulation as revealed by Nile red staining. (A) Nile red staining of root transition zone in 7-d-old seedlings after treatment with DMSO (0.1%), FB1 (5  $\mu$ M), PDMP (1  $\mu$ M), FEN (100  $\mu$ M), flufenacet (1  $\mu$ M), or auxinole (5  $\mu$ M) alone or together with 100 nM NAA for 6 h. (B) Bodipy dye staining of root transition zone in 7-d-old seedlings after treatment with DMSO (0.1%), FB1 (5  $\mu$ M), PDMP (1  $\mu$ M), FEN (100  $\mu$ M), flufenacet (1  $\mu$ M), or auxinole (10  $\mu$ M) alone or together with 100 nM NAA for 6 h. Images represent data taken from three independent experiments. (Scale bars, 10  $\mu$ m.)

**Dataset S1.** List of genes down-regulated in polysome-bound mRNA but not in total mRNA according to RNA sequencing result

[Dataset S1](#)

**Dataset S2. List of genes in lipid metabolism pathway that were tested by qRT-PCR**

[Dataset S2](#)

The genes labeled with red letters were not consistent with RNA sequencing data and the ones labeled with green letters were chosen to analyze the phenotypes of T-DNA insertion mutants.

**Dataset S3. List of genes in vesicular trafficking pathways which were validated by qRT-PCR**

[Dataset S3](#)

**Dataset S4. Primers used in qRT-PCR**

[Dataset S4](#)

**Dataset S5. Amount of lipid in each head group class in 7-d-old seedlings of Col and *rpl4d* mutants**

[Dataset S5](#)

**Dataset S6. List of T-DNA insertion mutants used in the report**

[Dataset S6](#)
